# Supplementary material
Source: Springer Nature journal article supplement (https://www.springermedizin.de/resource/supplementary/12889_2005_401_MOESM2_ESM.pdf/9500778)
Supplement: MOESM2 [file 9500778]

**Appendix A: Results of 27 studies aimed at improving the quality of healthcare for racial/ethnic minorities<sup>a</sup>**

| Study                            | Outcome                                 | How Measured          | Intervention Effect                                                                                                                                                       | Summary                 |                         |
|----------------------------------|-----------------------------------------|-----------------------|---------------------------------------------------------------------------------------------------------------------------------------------------------------------------|-------------------------|-------------------------|
|                                  |                                         |                       |                                                                                                                                                                           | Between-Group Summary   | Within-Group Summary    |
| <b>PREVENTION, ADULT</b>         |                                         |                       |                                                                                                                                                                           |                         |                         |
| <b>Adult, General Prevention</b> |                                         |                       |                                                                                                                                                                           |                         |                         |
| Gemson, 1995                     | Breast self examination counseling      | Patient report        | Changes in breast self-exam counseling rates received by patients pre and post intervention time period: intervention + 0.12 (p<0.01); control -0.06 (p=0.25).            | not available           | significant improvement |
|                                  | Nutrition and weight control counseling | Patient report        | Changes in nutrition and weight control counseling rates received by patients pre and post intervention time period: intervention +0.11 (p=0.02); control -0.05 (p=0.27). | not available           | significant improvement |
|                                  | Prevention knowledge                    | Provider written test | The overall change in physician knowledge of prevention was significantly greater for the intervention [+2.67 (SD 3.96)] compared to control [+1.58 (SD 3.43)] (p=0.03).  | significant improvement | not available           |
|                                  | Exercise counseling                     | Provider self report  | Positive change in physician exercise counseling practices comparing intervention to control (p<0.01).                                                                    | significant improvement | not available           |
|                                  | Nutrition and weight control counseling | Provider self report  | Positive change in physician nutrition and weight control counseling practices comparing intervention to control (p<0.01).                                                | significant improvement | not available           |
|                                  | Smoking cessation counseling            | Patient report        | Change in receipt of smoking cessation counseling rates pre and post intervention time period: intervention +0.03 (p=0.08), control +0.01 (p=0.4).                        | not available           | improvement             |
|                                  | Breast cancer screening                 | Provider self report  | Positive change in physician breast cancer screening practices comparing intervention to control (p=0.01).                                                                | significant improvement | not available           |
|                                  | Smoking cessation counseling            | Provider self report  | Positive change in physician smoking cessation counseling practices comparing intervention to control (p<0.01).                                                           | significant improvement | not available           |
|                                  | Exercise counseling                     | Patient report        | Changes in exercise counseling rates received by patients pre and post intervention time period: intervention + 0.07 (p<0.01); control + 0.03 (p=0.14).                   | not available           | significant improvement |

| Study          | Outcome                                                                                                 | How Measured             | Intervention Effect                                                                                                                                                                                                                                              | Summary                 |                         |
|----------------|---------------------------------------------------------------------------------------------------------|--------------------------|------------------------------------------------------------------------------------------------------------------------------------------------------------------------------------------------------------------------------------------------------------------|-------------------------|-------------------------|
|                |                                                                                                         |                          |                                                                                                                                                                                                                                                                  | Between-Group Summary   | Within-Group Summary    |
| McDonald, 1984 | Blood pressure, weight, serum glucose, serum hemoglobin, serum potassium, and blood urea nitrogen       | Medical record review    | No significant differences between patients assigned to intervention group physicians and control physicians.                                                                                                                                                    | no improvement          | not available           |
|                | Hospitalizations and emergency room visits for patients eligible for pneumococcal or influenza vaccines | Review of admission logs | Patients cared for by intervention group physicians had fewer hospitalizations and emergency room visits in the years influenza occurred ( $p < 0.02$ ).                                                                                                         | significant improvement | not available           |
|                | Overall number of hospitalizations, emergency room visits, or clinic visits                             | Review of admission logs | No significant overall differences between patients assigned to intervention group physicians and control physicians.                                                                                                                                            | no improvement          | not available           |
|                | Physician response to computerized reminders                                                            | Computer record review   | 49% of physicians responded to computerized reminders in intervention group compared to 29% in control group ( $p < 0.001$ ).                                                                                                                                    | significant improvement | not available           |
|                | Physician response to computerized reminders regarding preventive care                                  | Computer record review   | Physicians in intervention group were 2 to 4 times more likely to apply preventive care to their eligible patients than were control group physicians ( $p < 0.005$ ).                                                                                           | significant improvement | not available           |
| Turner, 1989   | Guaiac test rates                                                                                       | Medical record review    | Guaiac test rates increased from 34.1% to 50% in the physician-reminder group ( $p < 0.05$ ), increased from 32.6% to 42.5% ( $p = ns$ ) in the patient-reminder group, and increased from 29.7% to 46.1% ( $p < 0.05$ ) in the combined intervention group.     | not available           | significant improvement |
|                | Rectal exam rates                                                                                       | Medical record review    | Rectal exam rates increased from 10.4% to 52.6% in the physician-reminder group ( $p < 0.05$ ), increased from 32.3% to 46.9% ( $p < 0.05$ ) in the patient-reminder group, and increased from 34.1% to 57.1% ( $p < 0.05$ ) in the combined intervention group. | not available           | significant improvement |
|                | Pap smear rates                                                                                         | Medical record review    | Pap smear rates increased from 20.3% to 33.1% in the physician-reminder group ( $p = ns$ ), decreased from 29.4% to 27.5% ( $p = ns$ ) in the patient-reminder group, and increased from 20.5% to 40% ( $p = ns$ ) in the combined intervention group.           | not available           | no improvement          |
|                | Breast exam rates                                                                                       | Medical record review    | Breast exam rates increased from 37.5% to 53.5% in the physician-reminder group ( $p < 0.05$ ), increased from 41.2% to 53.6% ( $p < 0.05$ ) in the patient-reminder group, and increased from 38.3% to 47.8% ( $p = ns$ ) in the combined intervention group.   | not available           | significant improvement |

| Study                          | Outcome                                                | How Measured                                               | Intervention Effect                                                                                                                                                                                                                                                                                                                                                                  | Summary                 |                         |
|--------------------------------|--------------------------------------------------------|------------------------------------------------------------|--------------------------------------------------------------------------------------------------------------------------------------------------------------------------------------------------------------------------------------------------------------------------------------------------------------------------------------------------------------------------------------|-------------------------|-------------------------|
|                                |                                                        |                                                            |                                                                                                                                                                                                                                                                                                                                                                                      | Between-Group Summary   | Within-Group Summary    |
|                                | Mammogram rates                                        | Medical record review                                      | Mammogram rates increased from 14.3% to 15% in the physician-reminder group (p=ns), increased from 15% to 46.6% (p<0.05) in the patient-reminder group, and increased from 0% to 4.8% (p=ns) in the combined intervention group.                                                                                                                                                     | not available           | significant improvement |
|                                | Tetanus immunization rates                             | Medical record review                                      | No change reported in any group.                                                                                                                                                                                                                                                                                                                                                     | not available           | no improvement          |
| <b>Adult, Cancer Screening</b> |                                                        |                                                            |                                                                                                                                                                                                                                                                                                                                                                                      |                         |                         |
| Burack, 1994                   | Mammogram appointment rates                            | Mammogram appointment rates                                | At each site, full intervention status was associated with significant increase in mammogram appointment rates with absolute increase from 13% to 29% compared to limited intervention.                                                                                                                                                                                              | significant improvement | not available           |
|                                | Overall use of mammography                             | Mammogram appointment completion rates                     | Compared to limited intervention, full intervention was associated with a significant increase in the mammography rate at each of the sites.                                                                                                                                                                                                                                         | significant improvement | not available           |
|                                | Completion of first mammogram appointment              | Completed mammogram appointments                           | No differences in completion of first mammography appointment between full intervention groups.                                                                                                                                                                                                                                                                                      | not available           | not available           |
| Burack, 1996                   | Primary care visit rates in 1 year                     | Administrative data                                        | No significant relation between interventions and primary care visitation.                                                                                                                                                                                                                                                                                                           | no improvement          | not available           |
|                                | Mammography screening rates (completion in study year) | Administrative data                                        | Mammography rates were higher for the two groups of women assigned to the physician reminder intervention, but only at one of two HMO sites. No significant difference for patient intervention.                                                                                                                                                                                     | improvement             | improvement             |
| Burack, 1997                   | Annual mammography rates                               | Medical record review; computerized administrative records | At the end of year 2, mammography rates were 44% for full intervention versus 28% for limited intervention at the health department (OR: 1.84, 95% CI:1.40, 2.40) and 45% for full versus 46% for limited at the health maintenance organization (OR: 1.06, 95% CI: 0.08, 1.42).                                                                                                     | significant improvement | not available           |
| Burack, 1998                   | Completion of pap smear                                | Reports of pap-smear results                               | Women who received the patient and physician reminders together had 1.23 times the odds of completing pap smear screening (95% CI, 1.01, 1.50) than women who received neither intervention. The pap smear rates for women in the patient only or physician only intervention were not significantly different than the pap smear rates for women who received neither intervention. | significant improvement | not available           |
|                                | Primary care visits                                    | Administrative data                                        | No significant association of intervention.                                                                                                                                                                                                                                                                                                                                          | no improvement          | not available           |

| Study             | Outcome                                         | How Measured          | Intervention Effect                                                                                                                                                                                                                | Summary                 |                         |
|-------------------|-------------------------------------------------|-----------------------|------------------------------------------------------------------------------------------------------------------------------------------------------------------------------------------------------------------------------------|-------------------------|-------------------------|
|                   |                                                 |                       |                                                                                                                                                                                                                                    | Between-Group Summary   | Within-Group Summary    |
| Burack, 2003      | Completing pap smear                            | Medical record review | Combined reminder treatment associated with increased likelihood of pap smear (30% versus 23%, p=0.007) OR 1.39.                                                                                                                   | significant improvement | not available           |
|                   | Completing mammogram                            | Medical record review | No difference between combined reminder treatment and mammogram only reminder (39% versus 40%).                                                                                                                                    | no improvement          | not available           |
|                   | Visits to gynecology                            | Medical record review | Combined reminder treatment associated with increased rate of visits (34% versus 29%, p=0.001).                                                                                                                                    | significant improvement | not available           |
|                   | Visits to primary care physician                | Medical record review | No difference between groups.                                                                                                                                                                                                      | no improvement          | not available           |
| Chambers, 1989    | Mammography rates                               | Medical record review | At the end of the study period, 27% of the experimental group were up-to-date as compared with 21% of the control group (p=0.011).                                                                                                 | significant improvement | not available           |
| Dietrich, 1998    | Mammography rates in females over 50            | Medical record review | Both interventions and control groups showed increased rates, 58% to 65% in the intervention group (p=0.008) versus 59% to 64% in the control group (p=0.02).                                                                      | no improvement          | improvement             |
|                   | Oral cavity exam                                | Medical record review | Both intervention and control groups showed significantly increased rates, 67% to 78% in the intervention group versus 73% to 83% in the control group (p<0.001).                                                                  | no improvement          | significant improvement |
|                   | Rates of clinical breast exams in all females   | Medical record review | Both intervention and control groups showed increased rates, 50% to 63% in the intervention group versus 55% to 59% in the control group (significant in both groups).                                                             | no improvement          | significant improvement |
|                   | Rates of pap test in all females                | Medical record review | Intervention showed no change in rates, changing from 52% to 55%, while the control group increased rates from 43% to 62% (p<0.01)                                                                                                 | no improvement          | improvement             |
|                   | Fecal occult blood test                         | Medical record review | Both intervention and control groups increased rates, 9% to 19% in the intervention group versus 7% to 19% in the control group (not significant in either group).                                                                 | no improvement          | improvement             |
|                   | Digital rectal exam                             | Medical record review | Both intervention and control groups showed increased rates, 35% to 41% in the intervention group (not significant) versus 34% to 49% in the control group (p=0.03).                                                               | no improvement          | improvement             |
|                   | Rates of breast self-exam advice in all females | Medical record review | Both interventions and control groups showed increased rates, 4% to 13% in the intervention group (p<0.001) versus 3% to 8% in the control group (not significant). Intervention showed a greater increase than control (p=0.009). | significant improvement | significant improvement |
|                   | Sigmoidoscopy                                   | Medical record review | Neither intervention or control arm increased rates, 3% to 3% in the intervention group versus 2% to 2% in the control group.                                                                                                      | no improvement          | no improvement          |
| Mandelblatt, 1993 | Mammography screening rates                     | Medical record review | Significant increase in the mammography screening rate in intervention 18% to 40% versus control 18% to 18% (p<0.01).                                                                                                              | significant improvement | not available           |
|                   | Pap test screening rates                        | Medical record review | Significant increase in the pap test screening rate in the intervention 17% to 57% versus the control 12% to 18% (p<0.01).                                                                                                         | significant improvement | not available           |

| Study                           | Outcome                                                                                                 | How Measured                          | Intervention Effect                                                                                                                                                                                                                                                                                                                                                                                    | Summary                 |                         |
|---------------------------------|---------------------------------------------------------------------------------------------------------|---------------------------------------|--------------------------------------------------------------------------------------------------------------------------------------------------------------------------------------------------------------------------------------------------------------------------------------------------------------------------------------------------------------------------------------------------------|-------------------------|-------------------------|
|                                 |                                                                                                         |                                       |                                                                                                                                                                                                                                                                                                                                                                                                        | Between-Group Summary   | Within-Group Summary    |
| Manfredi, 1998                  | Rates of pap smears among eligible patients of HMO/not of HMO                                           | Medical record review                 | Rates increase in HMO patients only from 55.7% at baseline to 59.7% post-intervention but decrease in control group from 56.1% to 48.2% (not statistically significant).                                                                                                                                                                                                                               | significant improvement | not available           |
|                                 | Rates of clinical breast exams (CBE) among eligible patients of HMO/not of HMO                          | Medical record review                 | No effect of intervention in HMO patients/positive effect of intervention among non-HMO patients with rates increasing from 26.6 to 36.5% in intervention clinics and decreasing in control clinics ( $p < 0.05$ ).                                                                                                                                                                                    | significant improvement | not available           |
|                                 | Rates of fecal occult blood testing (FOBT) among eligible patients of HMO/not of HMO                    | Medical record review                 | Rates increased in both groups of patients. For HMO patients, rates increased from 3.2% to 12.5% in the intervention clinics with decrease in control clinics ( $p < 0.05$ ). In non-HMO patients, rates increased from 4.5% to 5.2% in intervention clinics while de                                                                                                                                  | significant improvement | not available           |
|                                 | Rates of mammograms among eligible patients of HMO/not of HMO                                           | Medical record review                 | No effect of intervention in either group of patients.                                                                                                                                                                                                                                                                                                                                                 | no improvement          | not available           |
| McCarthy, 1997                  | Mammography screening rates                                                                             | Computerized audit of billing records | Prior to the intervention, the proportion of visits in which women were up-to-date was 68% in the intervention clinic and 66% in each control clinic. At the end of evaluation, there was an absolute increase of 9% in the intervention group (95% CI 2-16%) while one control clinic had an absolute increase of 1% (95% CI: -5, 7%) and the other has an absolute decrease of 2% (95% CI: - 3, 5%). | not available           | significant improvement |
| <b>Adult ,Tobacco Cessation</b> |                                                                                                         |                                       |                                                                                                                                                                                                                                                                                                                                                                                                        |                         |                         |
| Ahluwalia, 1999                 | Smoking cessation counseling by provider; ASK if patient smokes cigarettes or any other form of tobacco | Patient report                        | Odds ratio of "ASK" between intervention and control: if smokes cigarettes 3.97 (2.87, 5.49); if uses other tobacco products 1.40 (0.91, 2.18).                                                                                                                                                                                                                                                        | significant improvement | not available           |
|                                 | Smoking cessation counseling by provider; ASSIST how or when to quit smoking                            | Patient report                        | Odds ratio of "ASSIST" between intervention and control groups: how to quit 1.60 (0.78, 3.31); set a date 0.74 (0.16, 3.34).                                                                                                                                                                                                                                                                           | improvement             | not available           |
|                                 | Smoking cessation counseling by provider; ADVISE to quit smoking                                        | Patient report                        | Odds ratio of "ADVISE" between intervention and control groups 1.75 (1.29, 2.35).                                                                                                                                                                                                                                                                                                                      | significant improvement | not available           |
|                                 | Smoking cessation counseling by provider; ARRANGE follow-up or refer to specialist                      | Patient report                        | Odds ratio of "ARRANGE" between intervention and control 1.97 (1.20, 3.24).                                                                                                                                                                                                                                                                                                                            | significant improvement | not available           |

| Study                     | Outcome                                                                                      | How Measured                            | Intervention Effect                                                                                                                                                     | Summary                 |                      |
|---------------------------|----------------------------------------------------------------------------------------------|-----------------------------------------|-------------------------------------------------------------------------------------------------------------------------------------------------------------------------|-------------------------|----------------------|
|                           |                                                                                              |                                         |                                                                                                                                                                         | Between-Group Summary   | Within-Group Summary |
| Allen, 1998               | Protocol adherence                                                                           | Patient report                          | Only 16% of the control group patients compared to nearly 70% of the intervention patients reported that their physician urged them to quit smoking.                    | improvement             | not available        |
|                           | 3 month quit rate                                                                            | Patient report                          | 6.1% for intervention group versus 5.2% for control group (p=not specified).                                                                                            | no improvement          | not available        |
|                           | 12 month quit rate                                                                           | Saliva cotinine tests                   | 3.2% for intervention group versus 2.8% for control group, (p=not specified).                                                                                           | no improvement          | not available        |
|                           | 12 month quit rate                                                                           | Patient report                          | 8.4% for intervention group versus 10.6% for control group (not significant).                                                                                           | no improvement          | not available        |
|                           | 3 month quit rate                                                                            | Saliva cotinine tests                   | 2% for intervention group versus 1.8% for control group (not significant).                                                                                              | no improvement          | not available        |
| <b>Adult, Cholesterol</b> |                                                                                              |                                         |                                                                                                                                                                         |                         |                      |
| Keyserling, 1997          | Difference in total cholesterol among participants not on lipid lowering therapy at one year | Blood tests                             | Average reduction of 0.14 mmol/L (5.3 mg/dL) greater in intervention group (p=0.01).                                                                                    | significant improvement | not available        |
|                           | Clinician dietary counseling behavior                                                        | Medical record review                   | Cholesterol mentioned in progress note for 10% of intervention patients and 30% of control patients on first routine follow-up (statistical significance not assessed). | no improvement          | not available        |
|                           | Referral for dietary counseling                                                              | Medical record review                   | 9% of control group patients compared to 2% of intervention patients referred for dietary counseling (statistical significance not assessed).                           | no improvement          | not available        |
|                           | Number patients taking lipid lowering medication                                             | Medical record review                   | 8% of intervention patients compared to 15% of control group patients were taking lipid-lowering medication on follow-up (p=0.05).                                      | no improvement          | not available        |
|                           | Difference in total cholesterol among all study participants at one year                     | Blood tests                             | Averaged over 1 year follow-up, the total cholesterol reduction in the intervention group was 0.08 mmol/L (3.0 mg/dL) greater than in control group (p=0.09).           | improvement             | not available        |
|                           | Dietary habits                                                                               | Patient report, dietary risk assessment | Sustained decrease in both groups with average reduction in the intervention group significantly more than for the control group (p>0.001).                             | significant improvement | not available        |

| Study                                | Outcome                                                                                            | How Measured                                          | Intervention Effect                                                                                                                                                                                     | Summary                 |                      |
|--------------------------------------|----------------------------------------------------------------------------------------------------|-------------------------------------------------------|---------------------------------------------------------------------------------------------------------------------------------------------------------------------------------------------------------|-------------------------|----------------------|
|                                      |                                                                                                    |                                                       |                                                                                                                                                                                                         | Between-Group Summary   | Within-Group Summary |
|                                      | Difference in LDL among all study participants at one year                                         | Blood tests                                           | Average reduction 0.10 mmol/L (3.7 mg/dL) greater in intervention group (p=0.08).                                                                                                                       | improvement             | not available        |
| <b>PREVENTION, CHILDREN</b>          |                                                                                                    |                                                       |                                                                                                                                                                                                         |                         |                      |
| <b>Health Behavior Screening</b>     |                                                                                                    |                                                       |                                                                                                                                                                                                         |                         |                      |
| Schubiner, 1994                      | Total time of interview                                                                            | Videotaped encounters                                 | Physicians in intervention group had shorter visits than physicians in the control group.                                                                                                               | improvement             | not available        |
|                                      | Accuracy of physician assessment of patient need for interventions in each "Safe Times" topic area | Compared to "gold standard" of psychologist interview | Physicians in the intervention group had higher agreement with psychologist ratings in identification of subjects at risk for depression and family conflicts than the physicians in the control group. | improvement             | not available        |
|                                      | Patient satisfaction                                                                               | Medical Interview Satisfaction Scale                  | No difference in satisfaction between groups.                                                                                                                                                           | no improvement          | not available        |
|                                      | Time spent making assessment versus counseling in each area                                        | Videotaped encounters                                 | Physicians in intervention group spent less time in assessment rather than counseling in each of the "Safe Times" areas (p<0.05).                                                                       | significant improvement | not available        |
|                                      | Total time spent in each of the "Safe Times" topics                                                | Videotaped encounters                                 | Physicians in intervention group spent less time discussing each of the specific "Safe Times" topics.                                                                                                   | improvement             | not available        |
|                                      | Time spent discussing "Safe Times" topics                                                          | Videotaped encounters                                 | Physicians in intervention group spent less time discussing all "Safe Times" topics.                                                                                                                    | improvement             | not available        |
| <b>Injury Prevention in Children</b> |                                                                                                    |                                                       |                                                                                                                                                                                                         |                         |                      |
| Gielen, 2001                         | Safety practices                                                                                   | Self report and home-observation                      | Groups did not differ.no improvement                                                                                                                                                                    | not available           |                      |
|                                      | Parental knowledge and beliefs regarding injury prevention                                         | Follow-up interview                                   | Groups did not differ.                                                                                                                                                                                  | no improvement          | not available        |
|                                      | Satisfaction                                                                                       | Patient report                                        | Patients in the intervention group rated the help they received with safety topics significantly higher than patients in the control group (p=0.01).                                                    | significant improvement | not available        |
|                                      | Injury prevention counseling                                                                       | Audiotape analysis                                    | Mention of safety strategies was higher in intervention group (9.4 +/- 6.8) than control group (3.7 +/- 3.2).                                                                                           | improvement             | not available        |

| Study                 | Outcome                                         | How Measured                     | Intervention Effect                                                                                                                                                                 | Summary                 |                         |
|-----------------------|-------------------------------------------------|----------------------------------|-------------------------------------------------------------------------------------------------------------------------------------------------------------------------------------|-------------------------|-------------------------|
|                       |                                                 |                                  |                                                                                                                                                                                     | Between-Group Summary   | Within-Group Summary    |
| <b>Well Baby Care</b> |                                                 |                                  |                                                                                                                                                                                     |                         |                         |
| Hornberger, 1996      | Adequacy of interpretation                      | Audiotape analysis               | The remote simultaneous translation group had a 13% lower rate of inaccurately interpreted mother utterance per visit than the proximate consecutive service (most were omissions). | improvement             | not available           |
|                       | Number of questions asked by mother             | Audiotape analysis               | Significantly more questions were asked by mothers in the remote simultaneous translation than with the proximate consecutive translation service (no p-values given).              | improvement             | not available           |
|                       | Provider preference for type of intervention    | Provider self report             | Providers preferred remote simultaneous translation to proximate consecutive translation.                                                                                           | improvement             | not available           |
|                       | Duration of encounter                           | Audiotape analysis               | No significant difference between intervention and control.                                                                                                                         | no improvement          | not available           |
|                       | Number of explanations by mother                | Audiotape analysis               | The number of mother explanations per visit was 22% more in the remote simultaneous translation group than in the proximate consecutive translation group visits.                   | improvement             | not available           |
|                       | Number of explanations by physicians            | Audiotape analysis               | The number of physician explanations per visit was 18% more in the remote simultaneous translation group than in the proximate consecutive translation group visits.                | improvement             | not available           |
|                       | Patient preference for type of intervention     | Patient self report              | All 17 mothers who experienced both types of translation and who responded to the survey preferred remote simultaneous translation.                                                 | improvement             | not available           |
|                       | Patient-physician eye-to-eye contact            | Provider self-report             | Physician reported that eye-to-eye contact was improved in remote simultaneous translation group.                                                                                   | improvement             | not available           |
| <b>MENTAL HEALTH</b>  |                                                 |                                  |                                                                                                                                                                                     |                         |                         |
| <b>Alcohol</b>        |                                                 |                                  |                                                                                                                                                                                     |                         |                         |
| Burge, 1997           | Addiction Severity Index (ASI) Family Score     | Interview; medical record review | Decreased over time in all groups (p=0.000), but decrease more significant for physician intervention group at 12 months (p=0.003).                                                 | significant improvement | significant improvement |
|                       | Addiction Severity Index (ASI) Employment Score | Interview; medical record review | No change over time in any group (not significant) at 12 months.                                                                                                                    | no improvement          | no improvement          |
|                       | Addiction Severity Index (ASI) Alcohol score    | Interview; medical record review | Decreased over time in all groups (p=0.000). No difference between groups at 12 months.                                                                                             | no improvement          | significant improvement |
|                       | Drinks per week                                 | Interview; medical record review | Decreased over time for all groups (p=0.000). No difference between groups at 12 months.                                                                                            | no improvement          | significant improvement |
|                       | Addiction Severity Index (ASI) Medical Score    | Interview; medical record review | Decreased over time in all groups (p=0.000) at 12 months.                                                                                                                           | no improvement          | significant improvement |
|                       | Mean Corpuscular Volume (MCV)                   | Blood test                       | Decreased over time in all groups (p=0.000). No difference between groups at 12 months.                                                                                             | no improvement          | significant improvement |



| Study             | Outcome                                                                         | How Measured                                        | Intervention Effect                                                                                                                                                                                                                                                                                                                                                                       | Summary                 |                         |
|-------------------|---------------------------------------------------------------------------------|-----------------------------------------------------|-------------------------------------------------------------------------------------------------------------------------------------------------------------------------------------------------------------------------------------------------------------------------------------------------------------------------------------------------------------------------------------------|-------------------------|-------------------------|
|                   |                                                                                 |                                                     |                                                                                                                                                                                                                                                                                                                                                                                           | Between-Group Summary   | Within-Group Summary    |
|                   | Liver enzymes (SGot, SGPt, GGT)                                                 | Blood test                                          | No difference between groups at 12 months. SGOT decreased over time (p=0.000) in all groups.                                                                                                                                                                                                                                                                                              | no improvement          | significant improvement |
| <b>Depression</b> |                                                                                 |                                                     |                                                                                                                                                                                                                                                                                                                                                                                           |                         |                         |
| Callahan, 1994    | Percentage of patients with depression diagnosis recorded at 6 months           | Medical record review                               | 32.3% (intervention) versus 12.1% (control) (p=0.002).                                                                                                                                                                                                                                                                                                                                    | significant improvement | not available           |
|                   | Percentage of patients with newly-prescribed antidepressant at 6 months         | Medical record review                               | 26.0% (intervention) versus 8.0% (control) (p=0.01).                                                                                                                                                                                                                                                                                                                                      | significant improvement | not available           |
|                   | Percentage of patients referred to psychiatry at 6 months                       | Medical record review                               | 13.7% (intervention) versus 12.1% (control) (no significant differences).                                                                                                                                                                                                                                                                                                                 | no improvement          | not available           |
|                   | Depression                                                                      | Hamilton Depression Scale                           | Both groups showed statistically significant improvement in depression at 6 months (no significant difference between groups).                                                                                                                                                                                                                                                            | no improvement          | not available           |
|                   | Percentage of patients in whom drug associated with depression was discontinued | Medical record review                               | 22.0% (intervention) versus 23.0% (control) (no significant difference).                                                                                                                                                                                                                                                                                                                  | no improvement          | not available           |
| Miranda, 2003     | Depression                                                                      | Composite International Diagnostic Interview (CIDI) | At 6 and 12 months, patients in both intervention groups were less likely than patients in control group to meet criteria for probable depressive disorder (39.9% versus 49.9%, p=0.001). In subgroup analysis only African American and Latino patients were significantly less likely to screen positive for depression, whereas the difference was not significant for white patients. | significant improvement | not available           |
|                   | Appropriate depression care                                                     | Not specified                                       | At 6 and 12 months, all patients (African American, Latino, and white) in both intervention groups were more likely than controls to receive counseling or to receive anti-depressant medications (50.9% versus 39.7%, p<0.001).                                                                                                                                                          | significant improvement | not available           |
|                   | Employment                                                                      | Telephone and mailed survey                         | At 6 and 12 months, there were no improvements for African American or Latino patients in employment rates, however, there were improvements for white patients.                                                                                                                                                                                                                          | no improvement          | not available           |

| Study                               | Outcome                                                                           | How Measured                                                                                 | Intervention Effect                                                                                                                                                                                                                                                             | Summary                 |                         |
|-------------------------------------|-----------------------------------------------------------------------------------|----------------------------------------------------------------------------------------------|---------------------------------------------------------------------------------------------------------------------------------------------------------------------------------------------------------------------------------------------------------------------------------|-------------------------|-------------------------|
|                                     |                                                                                   |                                                                                              |                                                                                                                                                                                                                                                                                 | Between-Group Summary   | Within-Group Summary    |
| <b>OTHER CLINICAL AREAS</b>         |                                                                                   |                                                                                              |                                                                                                                                                                                                                                                                                 |                         |                         |
| <b>Acute Respiratory Infections</b> |                                                                                   |                                                                                              |                                                                                                                                                                                                                                                                                 |                         |                         |
| Harris, 2003                        | Antibiotic prescription rates for acute bronchitis                                | Medical record review                                                                        | The proportion of patients with acute bronchitis decreased from 58% in the baseline period to 30% and 24% among patients exposed to the limited and full interventions ( $p < 0.001$ for intervention groups versus baseline). No differences between groups.                   | no improvement          | significant improvement |
|                                     | Antibiotic prescription rates for non-specific upper respiratory tract infections | Medical record review                                                                        | Antibiotic prescriptions for nonspecific upper respiratory tract infections decreased from 14% to 3% and 1% in the limited and full intervention groups ( $p < 0.001$ for intervention groups versus baseline). No difference between limited and full intervention groups.     | no improvement          | significant improvement |
| <b>Asthma</b>                       |                                                                                   |                                                                                              |                                                                                                                                                                                                                                                                                 |                         |                         |
| Evans, 1997                         | Patient education by physician and nurse                                          | Patient report                                                                               | Patient reported education by physicians was 71% for intervention versus 58% for control patients ( $p < 0.01$ ), and by nurses was 61% for intervention versus 41% for control patients ( $p < 0.05$ ).                                                                        | significant improvement | not available           |
|                                     | Continuity of care                                                                | Average number of visits made by children with asthma per year                               | Average number of visits made by children with asthma increased in intervention clinics from baseline through both follow-up periods (2.15 in 1992 versus 2.42 in 1993 versus 1.41 in 1991, $p < 0.001$ ) and remained the same in control clinics.                             | not available           | significant improvement |
|                                     | Use of appropriate medicines                                                      | Proportion of patients with asthma who had each type of medication dispensed                 | In the intervention clinics, a higher proportion of patients with asthma compared to controls were given inhaled anti-inflammatory medication (17 versus 3, $p < 0.001$ ), spacers devices (28 versus 3, $p < 0.001$ ), and anti-inflammatory meds (68 versus 50, $p < 0.05$ ). | significant improvement | not available           |
|                                     | Continuity of care                                                                | Proportion of patients treated for asthma in 1 year who returned for treatment the next year | Percent of patients with asthma in year 1 who returned in year 2 increased in intervention clinics 16% to 32% ( $p < .0002$ ) and decreased slightly in control clinics 14% to 12% (not significant).                                                                           | not available           | significant improvement |
|                                     | Identification/ treatment of asthma patients                                      | Number of asthmatic patients per 1000 clinic patients                                        | Intervention clinics doubled ( $p < .001$ ) rate at which they identified asthma patients with no change in control clinics during both 1st and 2nd follow-up years.                                                                                                            | not available           | significant improvement |
| <b>Chronic Renal Disease</b>        |                                                                                   |                                                                                              |                                                                                                                                                                                                                                                                                 |                         |                         |
| Harris, 1998                        | All outpatient clinic visits (years 3-5 after enrollment)                         | Medical record review                                                                        | Intervention group patients had significantly more outpatient clinic visits overall than did control group patients, 26 versus 18 ( $p < 0.001$ ).                                                                                                                              | significant improvement | not available           |
|                                     | Blood pressure (years 3-5 after enrollment)                                       | Medical record review                                                                        | No significant differences in systolic and diastolic blood pressures between groups.                                                                                                                                                                                            | no improvement          | not available           |

| Study                    | Outcome                                                  | How Measured                                                                                                                   | Intervention Effect                                                                                                                                    | Summary               |                      |
|--------------------------|----------------------------------------------------------|--------------------------------------------------------------------------------------------------------------------------------|--------------------------------------------------------------------------------------------------------------------------------------------------------|-----------------------|----------------------|
|                          |                                                          |                                                                                                                                |                                                                                                                                                        | Between-Group Summary | Within-Group Summary |
|                          | Emergency department visits (years 3-5 after enrollment) | Medical record review                                                                                                          | No significant difference in emergency department visits between groups.                                                                               | no improvement        | not available        |
|                          | Hospitalizations (years 3-5 after enrollment)            | Medical record review                                                                                                          | No significant difference in number of hospitalizations between groups.                                                                                | no improvement        | not available        |
|                          | Calcium channel blocker use (years 3-5 after enrollment) | Medical record review                                                                                                          | Patients in the intervention group were more likely to be on a calcium channel blocker than were patients in control group, 49% versus 35% (p=0.003).  | no improvement        | not available        |
|                          | Ophthalmology clinic visits (years 3-5 after enrollment) | Medical record review                                                                                                          | Patients in the intervention group had a greater number of ophthalmology appointments than did patients in the control group, 1.8 versus 1.2 (p=0.07). | improvement           | not available        |
|                          | Cumulative 5 year mortality                              | Death certificate from Indiana State Department of Health, hospital death summaries, discharge status reports, autopsy reports | No significant difference in intervention (29%) versus control (33%) group in cumulative 5 year mortality.                                             | no improvement        | not available        |
|                          | Change in renal function (years 3-5 after enrollment)    | Medical record review                                                                                                          | Intervention group patients had lower creatinine clearance than did control group patients, 30 versus 34 (p=0.10).                                     | no improvement        | not available        |
| <b>Emergency Systems</b> |                                                          |                                                                                                                                |                                                                                                                                                        |                       |                      |
| Kellermann, 1993         | Neurological deficits                                    | Physician/nurse report                                                                                                         | Neurological outcomes for survivors of both groups were similar.                                                                                       | no improvement        | not available        |
|                          | Survival to hospital discharge                           | Hospital report                                                                                                                | Patients treated by automated external defibrillator equipped responders were no more likely to survive to hospital discharge.                         | no improvement        | not available        |
|                          | Survival to hospital admission                           | Written report                                                                                                                 | Patients treated by automated external defibrillator equipped responders were no more likely to survive to hospital admission.                         | no improvement        | not available        |

| Study              | Outcome                                             | How Measured                       | Intervention Effect                                                                                                                                                                               | Summary                 |                      |
|--------------------|-----------------------------------------------------|------------------------------------|---------------------------------------------------------------------------------------------------------------------------------------------------------------------------------------------------|-------------------------|----------------------|
|                    |                                                     |                                    |                                                                                                                                                                                                   | Between-Group Summary   | Within-Group Summary |
| <b>End of Life</b> |                                                     |                                    |                                                                                                                                                                                                   |                         |                      |
| Dexter, 1998       | Completion of either Instruction or Proxy Directive | Patients complete either Directive | The percentage of patients who completed either directive was 15% in the instruction and proxy group, 7% in the instruction group, 3% in the proxy group, and 4% in the control group.            | improvement             | not available        |
|                    | Discussion of advance directives                    | Patient report                     | Compared with control, dissemination of advanced directives had OR of 7.7 (3.4 to 18) in instruction and proxy group; 4.4 (2.1 to 9.4) in instruction group; and 2.5 (1.1 to 5.5) in proxy group. | significant improvement | not available        |
|                    | Initiation of discussion                            | Patient report                     | Discussions initiated by physician in 86% of instances in instruction and proxy group, 77% in instruction group, 43% in proxy group, and 38% in control group.                                    | improvement             | not available        |
|                    | Completion of Proxy Directive                       | Completion of form by patient      | The percentage of patients who complete a Proxy Directive was 8% in the instruction and proxy group, 4% in the instruction group, 1% in the proxy group, and 2% in the control group.             | improvement             | not available        |
|                    | Completed Instruction Directive                     | Completion of form by patient      | The percentage of patients who completed an instruction directive in the instruction and proxy group was 15%, 7% in instruction group, 2% in proxy group, and 2% in control group.                | improvement             | not available        |

<sup>a</sup> The overall summary columns are presented for both comparisons between intervention arms and comparisons within intervention arms (such as when there was a pre- and a post-intervention assessment), as some studies presented one but not the other, whereas other studies presented both comparisons. For this purpose, “significant improvement” refers to outcomes that showed an effect that was statistically significantly better, “improvement” refers to outcomes that showed a better effect that was not statistically significant, “no improvement” refers to outcomes that were not improved, “negative effect” refers to outcomes that were worse after the intervention, and “not available” refers to outcomes for which no comparison was made.
